# Supplementary material for: RN7SK small nuclear RNA controls bidirectional transcription of highly expressed gene pairs in skin
Source: PubMed Central journal article supplement (PMC8497571; doi:10.1038/s41467-021-26083-4), 2021-10-07
Supplement: 41467_2021_26083_MOESM1_ESM.pdf [file 41467_2021_26083_MOESM1_ESM.pdf]

**Figure S1. Loss of cellularity induces wound-like response in the epidermis.** (a) Treatment regime of experiment shown in (b). (b) *Rn7sk* RNA *in situ* hybridisation (brown; top panel), haematoxylin and eosin staining (H&E, middle panel) and KRT10 (green) and KRT14 (red) immunofluorescence (bottom panel). (c) *Rn7sk* RNA levels in mouse skin after 2 weeks of 4-OHT exposure in control (CTR; n = 8 mice) and *Rn7sk* cKO (cKO; n = 4 mice) animals. (d) H&E staining from mouse skin treated with 4-OHT for 1 or 2 weeks, showing how skin thickness was quantified in Figure 1. Black stroke: normal; red bar: thin skin; grey bar: thick skin. (e, f) Ki67 (green) immunofluorescence (e) and quantification of Ki67-positive cells in IFE and basal layer (f) in control (grey; CTR) and *Rn7sk* cKO (red) mice after 1 month 4-OHT treatment (n = mice). (g) *Rn7sk* RNA *in situ* hybridisation (brown; top panels); H&E staining (2<sup>nd</sup> row panels); KRT10 (K10; green) and KRT14 (K14; red) (3<sup>rd</sup> row panels) and KRT6 (K6; green) (lower panels) immunofluorescence in mouse skin after 1 month 4-OHT treatment. (h) Treatment regime of experiment shown in (i). (i) *Rn7sk* RNA *in situ* hybridisation (brown; top panel), H&E staining (middle panel) and TdTomato (tdTom; red) immunofluorescence (bottom panel). Data generated from mouse line 1 are shown in (a-i). (j) Number and percent of mice per genotype obtained from crossing heterozygous *Rn7sk* +/- mice. (k) *Rn7sk* RNA *in situ* hybridisation (brown; top panel), H&E staining (bottom panel) of skin from surviving adult *Rn7sk* -/- and control mice. DAPI (blue): nuclear counterstain (b,e,g,i). Shown are representative images from at least three different mice per genotype (b,e,g,i,k). Scale bars: 10  $\mu$ m. Shown is mean  $\pm$  SD. Unpaired two-tailed t test (f) with Welch's correction (c). Box plots in (f) show all points and mean with whiskers ending at minimum and maximum values. Exact p-values are indicated. Source data are provided as a Source Data file.

## Supplementary Figure 2

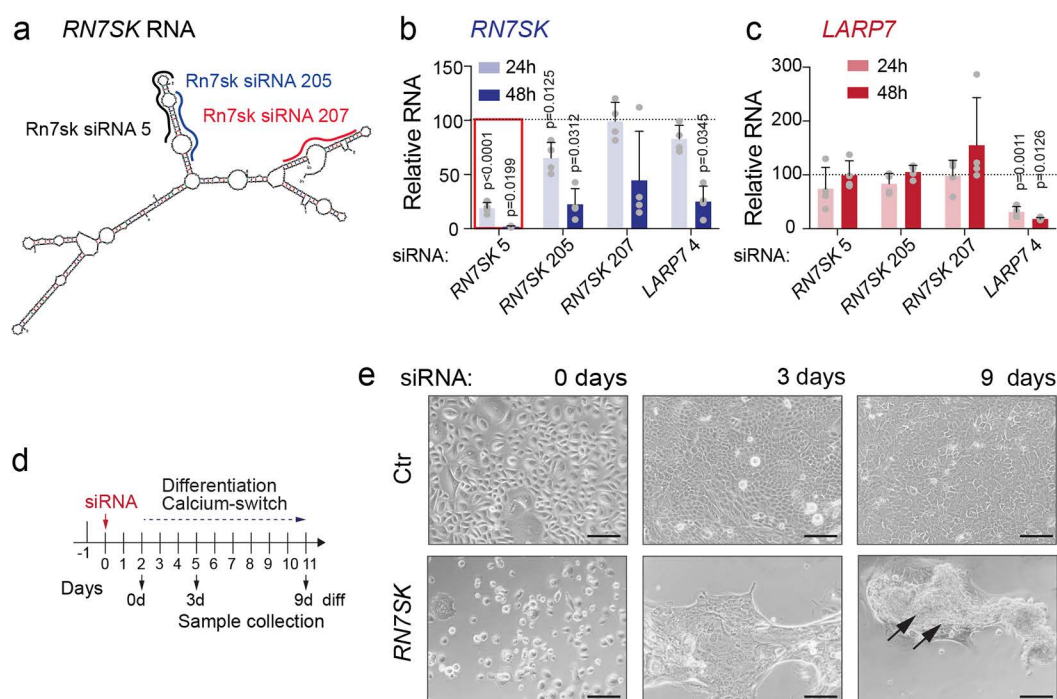

**Figure S2. *RN7SK*-depletion accelerates differentiation of human primary keratinocytes.** (a) Predicted *RN7SK* secondary structure determined using mfold (<http://unafold.ma.albany.edu/?q=mfold>). *RN7SK* siRNAs 5 (black), 205 (blue), 207 (red) targeted sequences are highlighted. (b, c) RNA levels of *RN7SK* (blue) and *LARP7* (red) in primary human keratinocytes after 24 (light blue or red) or 48 (dark blue or red) hours (h) of transfection with the indicated siRNAs. Data are normalised to *GAPDH* and expressed as relative to control siRNA (n = 4 transfections). (d) Treatment regime of human primary keratinocytes in days (d) shown in (e). (e) Bright field images of human keratinocytes transfected with *RN7SK* or control (Ctr) siRNAs during calcium-induced differentiation at the indicated time points. Arrows highlight enhanced stratification. Scale bars: 100  $\mu$ m. Data are presented as mean values  $\pm$  SD (b,c). Unpaired t test with Welch's correction (b,c). Exact p-values are indicated. Source data are provided as a Source Data file.

# Supplementary Figure 3

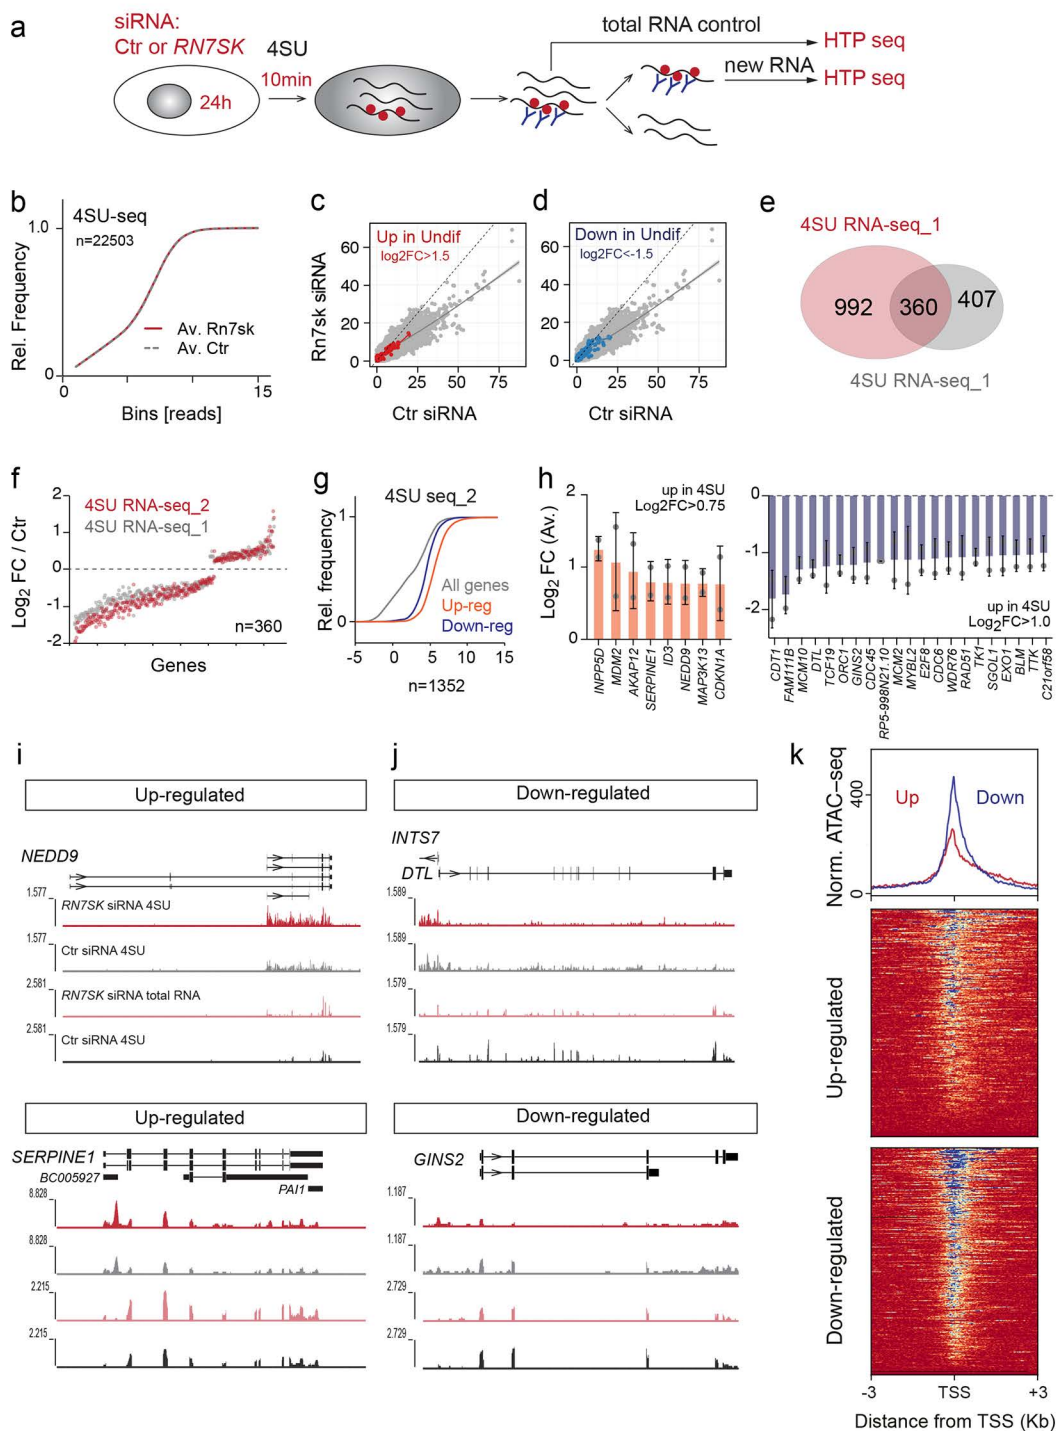

**Figure S3. *RN7SK* maintains expression levels of highly expressed genes.** (a) Schematic representation of metabolic RNA labelling experiments: primary human epidermal cells were transduced with control (Ctr) or *RN7SK* siRNAs for 24 hours. New RNA was labelled with 4SU for 10 minutes (min). High throughput sequencing (HTP seq) was performed on labelled and total unlabelled RNA. (b) Cumulative relative (rel.) frequency of average (Av.) sequence read counts (n = 4 sequencing reactions) of all genes in control (Ctr; grey) or *RN7SK*-depleted (red) cells. (c, d) Plot of RNA Pol II pausing index of up- (c) and down- (d) regulated genes in primary human keratinocytes transduced with Ctr or *RN7SK* siRNAs. Each dot represents one gene. (e, f) Overlap (e) and log<sub>2</sub> fold-change (FC) (f) of significantly different new transcripts (padj<0.05) in two independent 4SU seq experiments. n = transcripts. (g) Cumulative rel. frequency of sequence read counts of all genes (grey) or up- (orange) or down- (blue) regulated new transcripts (4SU RNA seq\_2). (h) Significantly different (padj<0.05) top up- (left panel; orange) and down- (right panel; blue) regulated new transcripts in two independent 4SU RNA sequencing experiments. Shown is the average log<sub>2</sub> FC. (i, j) UCSC genome browser shots of 4SU and total RNA sequencing reads of the indicated up- (i) and down- (j) regulated genes. (k) Density plot (upper panel) showing ATAC seq normalized reads at transcription TSSs of up- (red) or down-regulated (blue) genes in 4SU RNA seq dataset at 48h. Heat maps (lower panels) showing ATAC seq signal at TSS of up- (top) or down-regulated (bottom) genes in 4SU RNA seq (padj < 0.05, Log<sub>2</sub>Fc > 0.3).

# Supplementary Figure 4

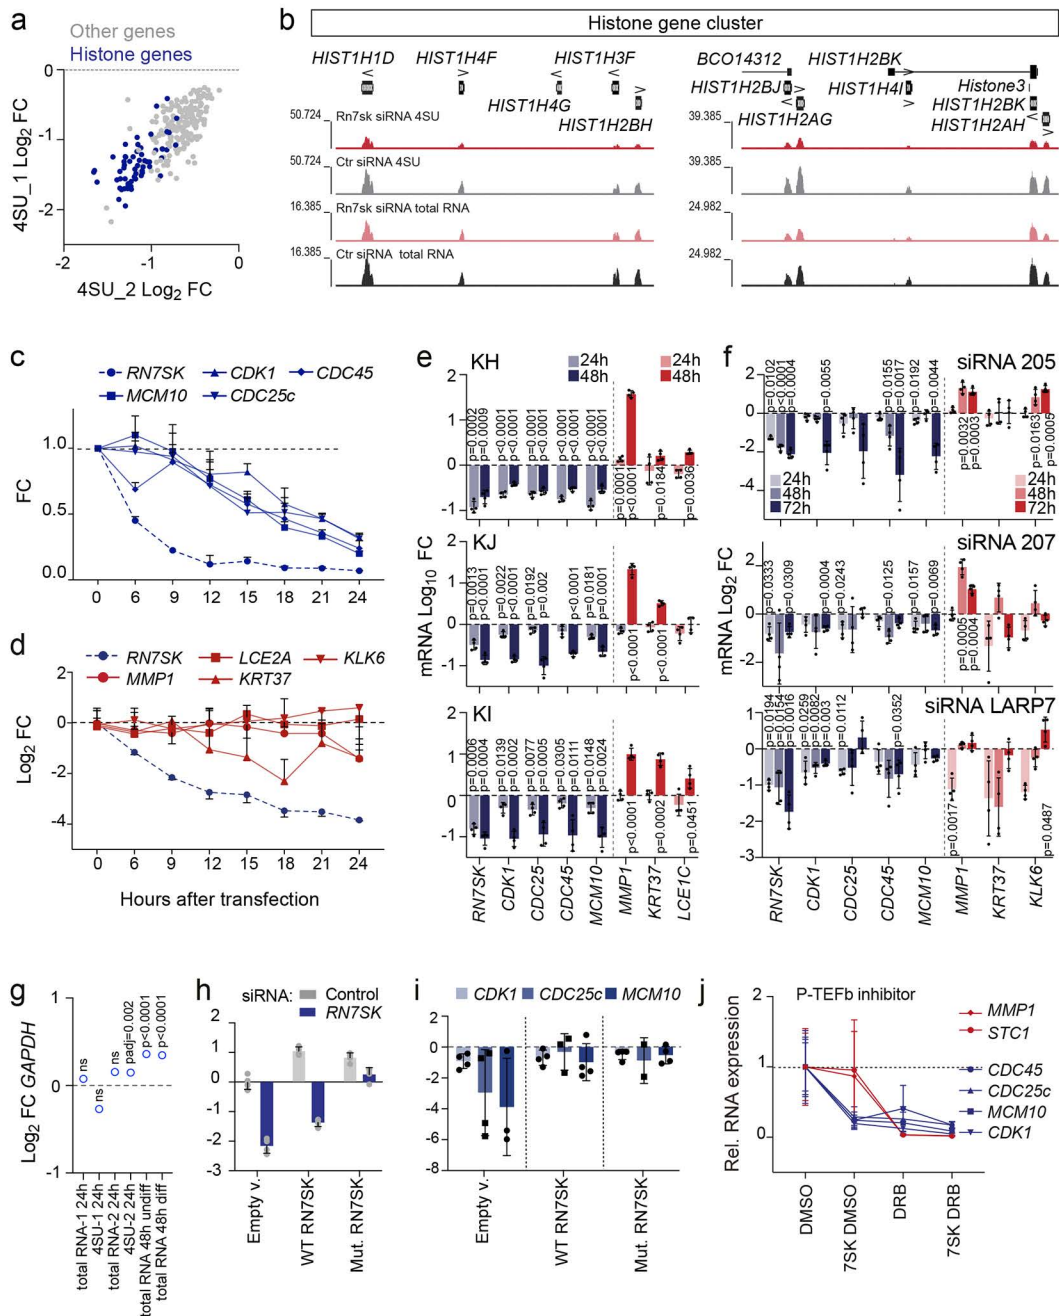

**Figure S4. RN7SK directly represses expression of cell cycle regulators.** (a) Significantly down-regulated newly transcribed histone gene (blue) in two independent 4SU RNA-seq datasets. Grey: Other genes. (b) UCSC genome browser shot showing example of histone gene cluster repressed in *RN7SK*-depleted cells. (c, d) RNA level fold-change (FC) of four down-regulated (blue) cell cycle regulators (c) and four up-regulated (red) genes (d) in primary human keratinocytes in a time course after knock-down of *RN7SK* (dotted line). (e, f)  $Log_{10}$  FC of RNA of the indicated genes down- (blue) or up- (red) regulated in three different primary human keratinocytes lines (KH, KJ, KI) (e) or using three different siRNAs (205, 207, LARP7) (f) 24 (light colour), 48 (darker colour) or 72 (darkest colour) hour (h) after control or indicated siRNA transfections. (g)  $Log_2$  FC of *Gapdh* reads in the indicated RNA sequencing datasets. Ns: not significant. (h, i) *RN7SK* (h) or cell cycle regulators (i) RNA levels in human primary keratinocytes infected with constructs expressing wild-type or mutated *RN7SK* 24 h after control (grey) or *RN7SK* (blue) siRNA transfections. RNA levels in (i) are normalized to control siRNA transfected cells. (n = 4 transfections). (j) Relative (Rel.) RNA levels for the indicated up- (red) or down- (blue) regulated RNAs in human keratinocytes transfected with control or *RN7SK* siRNAs for 24 hours and treated with DRB for the last 6 hours. RT-qPCR data are normalised to *GAPDH* and expressed as mean  $\pm$  SD relative to the respective controls (n = 4 transfections) (c-f, h, i) or mean values  $\pm$  SEM (j). Unpaired two-tailed t test with Welch's correction (e, f). Wald test (g). Exact p-values are indicated. Source data are provided as a Source Data file.

## Supplementary Figure 5

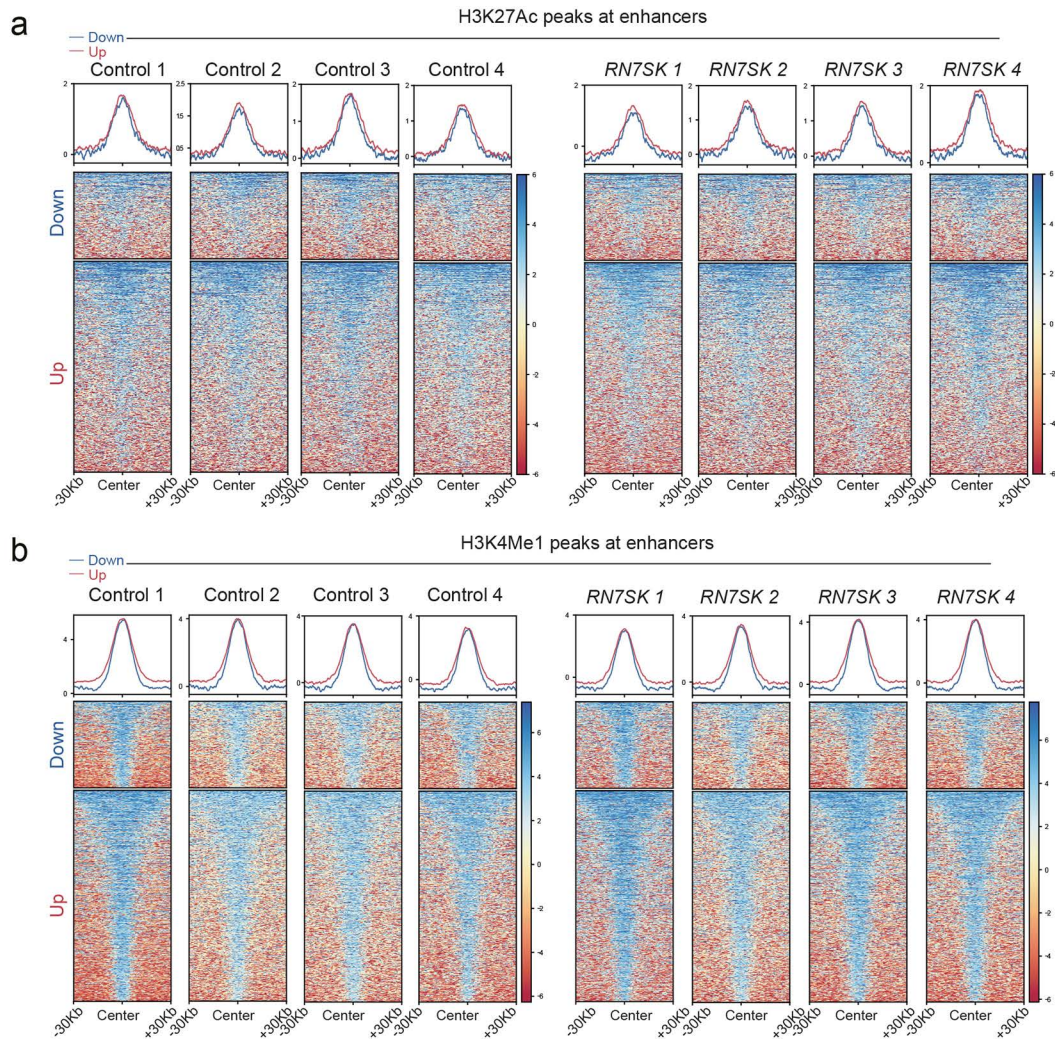

**Figure S5. *RN7SK*-depletion does not alter chromatin in promoters and putative enhancers. (a, b)** All replicate heatmaps showing H3K4Me1 (a) and H3K27Ac (b) putative enhancers (H3K4me1-positive and H3K27ac-positive peaks) close to the transcriptional start site (TSS) (< 30 Kb) of up- (red) and down- (blue) regulated genes.

## Supplementary Figure 6

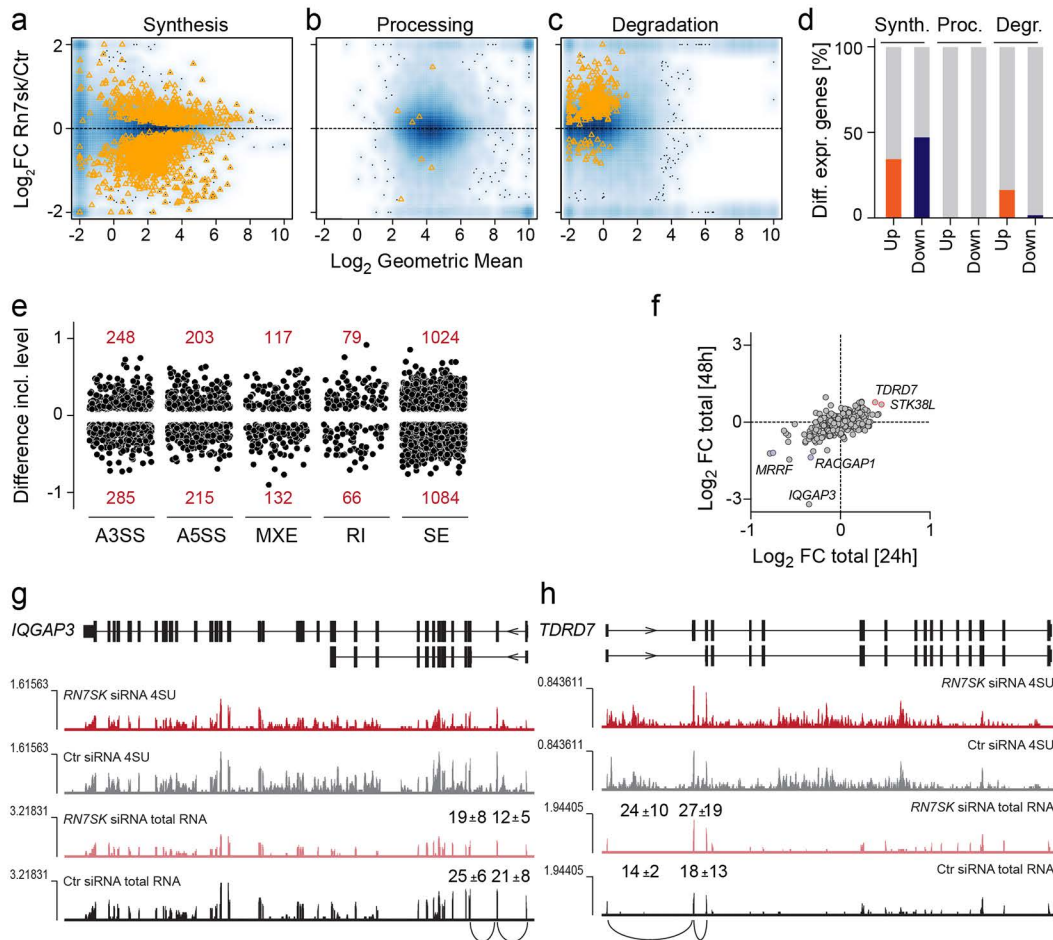

**Figure S6. Effect of *RN7SK*-depletion on RNA synthesis, splicing and degradation.** (a-c) Density scatter plots (darker colours for higher density) of  $\log_2$  fold-changes (FC) in the absence of *RN7SK* versus time points (0 and 24 hours and 10 minutes RNA labelling time). Shown are changes in RNA levels caused by differences in RNA synthesis (a), processing (b) and mature mRNA degradation (c). Yellow triangle: one gene. Only genes with  $\geq 20$  counts per million are shown. (d) Quantification of (a-c). (e) Splicing differences in total RNA, 24 hours after *RN7SK*-depletion (splicing FDR $>0.05$ ; inclusion difference  $>0.1$  or  $<-0.1$ ). A3SS: alternative 3' splice site; A5SS: alternative 5' splice site; MXE: mutual exclusive exon; RI: intron retention; SE: exon skipping. (f) Correlation of  $\log_2$  fold change (FC) RNA levels commonly found to be differentially spliced in two independent total RNA-seq datasets at 24 or 48 hours after *RN7SK* depletion. (g, h) Examples of alternatively spliced transcripts resulting in down- (g) or up- (h) regulation of the RNA shown as UCSC genome browser shots. Source data are provided as a Source Data file.



## Supplementary Figure 7

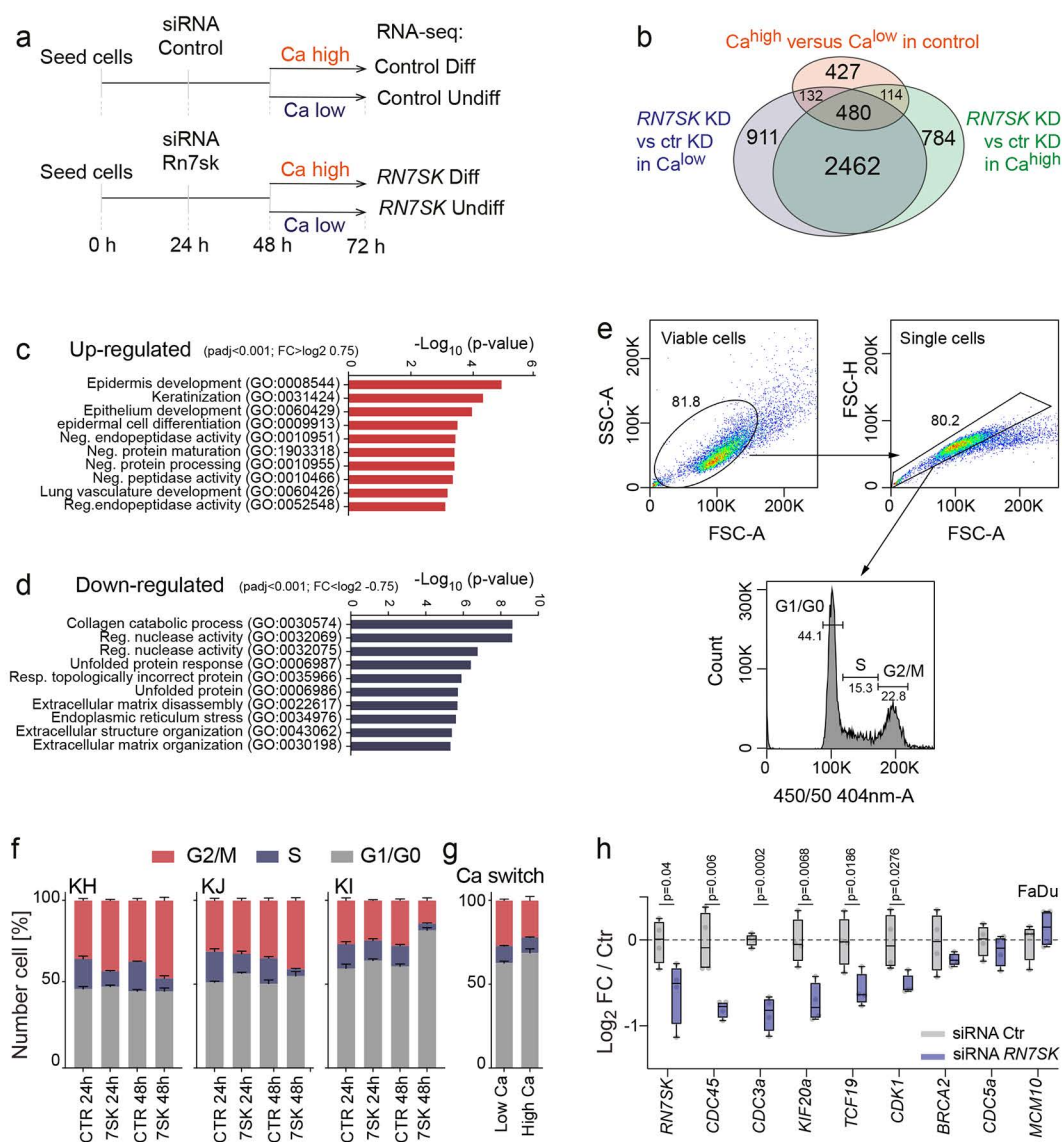

**Figure S7. Differentiation of RN7SK-depleted keratinocytes is distinct from calcium-induced differentiation.** (a) Experimental set-up and treatment regime of primary human epidermal cells for RNA sequencing experiments. (b) Venn diagram showing significantly changed genes (padj < 0.001) in the indicated datasets compared to control cells. KD: knock-down. (c, d) Gene ontology analysis of up- (c) or down-regulated (d) genes (padj < 0.001; log<sub>2</sub>FC > or < 0.75) in response to calcium differentiation (calcium switch) of human keratinocytes. (e) Gating strategy to determine the percentage of cells in cell cycle phases. (f, g) Quantification of cell cycle profile of different lines of human primary keratinocytes 24 or 48 hours (f) after siRNA transfection (f) or grown in calcium low or high conditions (n = 5 transfections) (g). (h) RT-qPCR for the indicated RNAs in RN7SK-depleted FaDu cells (blue). Data are normalised to 18s rRNA and expressed as mean relative to empty vector control (siRNA Ctr; grey) (n = 3 or 4 transfections). Data are presented as mean values ± SD (f,g). Box plots show all points and mean with whiskers ending at minimum and maximum values (i). Unpaired two-tailed t-test. Exact p-values are indicated. Source data are provided as a Source Data file.

**Table S1. Primer sequences**

| Primer name                | Sequence                   | Usage                    |
|----------------------------|----------------------------|--------------------------|
| oIMR0042                   | CTAGGCCACAGAATTGAAAGATCT   | Genotyping KRT14 CRE ERT |
| oIMR0043                   | GTAGGTGGAAATTCTAGCATCATCC  | Genotyping KRT14 CRE ERT |
| oIMR3797                   | ATACCGGAGATCATGCAAGC       | Genotyping KRT14 CRE ERT |
| oIMR3798                   | AGGTGGACCTGATCATGGAG       | Genotyping KRT14 CRE ERT |
| Tom WT fwd                 | AAG GGA GCT GCA GTG GAG TA | Genotyping Rosa:TdTomato |
| Tom WT rev                 | CCG AAA ATC TGT GGG AAG TC | Genotyping Rosa:TdTomato |
| Tom mut rev                | GGC ATT AAA GCA GCG TAT CC | Genotyping Rosa:TdTomato |
| Tom mut fwd                | CTG TTC CTG TAC GGC ATG G  | Genotyping Rosa:TdTomato |
| 7SK 3' ARM S               | GGTCTACAGAGAAAGTCCC        | Genotyping Rn7SK         |
| 7SK Targeting seq 14319 AS | TGAAGGTTCCAAGCAGTCCG       | Genotyping Rn7SK         |
| D5 AS                      | GATGGCGCAACGCAATTAA        | Genotyping Rn7SK         |
| h7SK_P20_L                 | attgatgccagggttgat         | Q-PCR human Rn7sk        |
| h7SK_P20_R                 | ctctatcggggatggtcgt        | Q-PCR human Rn7sk        |
| hGAPDH 5'                  | gagtccactggcgtcttcac       | Q-PCR human GAPDH        |
| hGAPDH 3'                  | ttcacacctatgacgaacat       | Q-PCR human GAPDH        |
| m7SK P109 L                | tccattgtaggagaacgtaggg     | Q-PCR mouse Rn7sk        |
| m7SK P109 R                | agcgcctcattggatgt          | Q-PCR mouse Rn7sk        |
| mGAPDH 5'                  | tccactcatggcaaatcaa        | Q-PCR mouse GAPDH        |
| mGAPDH 3'                  | ttgatgttagtgggtctcg        | Q-PCR mouse GAPDH        |
| Cdc45 TSS s1               | AAAAGGCCAGGCGAAGAC         | MNase protection assay   |
| Cdc45 TSS s2               | AATGCCCTTTCGTGATTT         | MNase protection assay   |
| Cdc45 TSS s3               | GGCCATTGTCCTTACGA          | MNase protection assay   |
| Cdc45 TSS s4               | CGACTACACTACCCACAATGC      | MNase protection assay   |
| Cdc45 TSS s5               | TCGGGCGGAAC TAAGCTA        | MNase protection assay   |
| Cdc45 TSS s6               | GCCCCATTGGGTATGTGA         | MNase protection assay   |
| Cdc45 TSS s7               | TGGGAGGCAGTAGGCTTC         | MNase protection assay   |
| Cdc45 TSS s8               | GCGTCGCTTTTCTGGGTA         | MNase protection assay   |
| Cdc45 TSS s9               | GAGGTGACGCTTCTTTGG         | MNase protection assay   |
| Cdc45 TSS s10              | TGAATGGCAGAGCGCTAA         | MNase protection assay   |
| Cdc45 TSS s11              | CTGGACCAATCGGAGGAG         | MNase protection assay   |
| Cdc45 TSS s12              | ATTTGGCGGGAGTCTTGA         | MNase protection assay   |
| Cdc45 TSS s13              | TACGAGGTGGTCCAGAGC         | MNase protection assay   |
| Cdc45 TSS s14              | GGTGGGGAAGGGATGAGG         | MNase protection assay   |
| Cdc45 TSS s15              | GTTACGCCGCTGTCTCT          | MNase protection assay   |
| Cdc45 TSS s16              | TGTGTGCGTGCAAGATCC         | MNase protection assay   |
| Cdc45 TSS s17              | CGGGCAGAGTGTCCAGGAT        | MNase protection assay   |
| Cdc45 TSS as1              | AAATCACGAAAGGGCATT         | MNase protection assay   |
| Cdc45 TSS as2              | TGGGCCCTACTAAATTCGTC       | MNase protection assay   |
| Cdc45 TSS as3              | GAGTCTCGATGGCTGAAG         | MNase protection assay   |
| Cdc45 TSS as4              | CTAGTTCCGCCGAGTC           | MNase protection assay   |
| Cdc45 TSS as5              | GGCAGCATTTACGTTTGC         | MNase protection assay   |
| Cdc45 TSS as6              | AGCCTACTGCCTCCCACT         | MNase protection assay   |
| Cdc45 TSS as7              | GTTGCCCCCTTCAACTCT         | MNase protection assay   |
| Cdc45 TSS as8              | CCCAAAGAAGCGTACCT          | MNase protection assay   |
| Cdc45 TSS as9              | ATTGGAGGCGGCCATTAG         | MNase protection assay   |
| Cdc45 TSS as10             | CTCCTCGATTGGTCCAG          | MNase protection assay   |
| Cdc45 TSS as11             | CGCGCTGAGGTACCAAGA         | MNase protection assay   |
| Cdc45 TSS as12             | CGGAAATCGGACACGAAC         | MNase protection assay   |
| Cdc45 TSS as13             | GCTCCCTCATCCCTTC           | MNase protection assay   |
| Cdc45 TSS as14             | CCTCTATCGGGGAAGAGC         | MNase protection assay   |
| Cdc45 TSS as15             | AAGGATCTTGACGCACA          | MNase protection assay   |
| Cdc45 TSS as16             | ACGCAGCACCTCACCTC          | MNase protection assay   |
| Cdc45 TSS as17             | GCAACCTCTCCTCCGAGT         | MNase protection assay   |
| Mcm10 TSS s1               | TCGGGAAAATGGTGTTTC         | MNase protection assay   |
| Mcm10 TSS s2               | TGGTGAAGGGGAAACTCA         | MNase protection assay   |
| Mcm10 TSS s3               | CACTTCCCAAGGTCAGA          | MNase protection assay   |
| Mcm10 TSS s4               | GGACCGGATCTGTTTGGT         | MNase protection assay   |
| Mcm10 TSS s5               | GCGTCAGGAGTTGAGGTG         | MNase protection assay   |
| Mcm10 TSS s6               | CCGCAGGGAAAATACTGG         | MNase protection assay   |
| Mcm10 TSS s7               | GGGCGCCAGACACTCTAT         | MNase protection assay   |
| Mcm10 TSS s8               | GGCGTCCAATGACGTAAA         | MNase protection assay   |
| Mcm10 TSS s9               | CTGGCGTAGCCAGTCACT         | MNase protection assay   |
| Mcm10 TSS s10              | TTGCTGGCCGTCTACTAA         | MNase protection assay   |
| Mcm10 TSS s11              | AGGAATCGGGTTCTTCTTTT       | MNase protection assay   |
| Mcm10 TSS s12              | GCCTGGGCTTTCTTTTATTC       | MNase protection assay   |
| Mcm10 TSS s13              | TTCATTCAATGGTTTCTCGT       | MNase protection assay   |
| Mcm10 TSS as1              | CTGAGTTTCCCCTTACCA         | MNase protection assay   |
| Mcm10 TSS as2              | CAAACAGATCCGGTCCACTT       | MNase protection assay   |
| Mcm10 TSS as3              | GTCAGCCTTATGTCCATTCCG      | MNase protection assay   |
| Mcm10 TSS as4              | GCTCTGGGACCGACTGTT         | MNase protection assay   |

|                 |                        |                        |
|-----------------|------------------------|------------------------|
| Mcm10 TSS as5   | CTGGTGCCGGGAAGTTA      | MNase protection assay |
| Mcm10 TSS as6   | GGGACCTTCTGTCCGTA      | MNase protection assay |
| Mcm10 TSS as7   | GGACGCCCTTTTGTGG       | MNase protection assay |
| Mcm10 TSS as8   | AGCACTGACTGGCTACGC     | MNase protection assay |
| Mcm10 TSS as9   | ACCCGCCAAAATTCACAC     | MNase protection assay |
| Mcm10 TSS as10  | AGGCACTTGGAAGCACT      | MNase protection assay |
| Mcm10 TSS as11  | CCAATGAATGAATGAATGAATG | MNase protection assay |
| Mcm10 TSS as12  | ACCGTCCGCATTCAATAATC   | MNase protection assay |
| Mcm10 TSS as13  | GATCCGAGCCATGCACAC     | MNase protection assay |
| Cdk1 TSS s1     | ACATTTTTGAGGCGGTCT     | MNase protection assay |
| Cdk1 TSS s2     | CCATTTCCCTTCTAAGGTCAC  | MNase protection assay |
| Cdk1 TSS s3     | TCACGCATTTAGAAAAACATAA | MNase protection assay |
| Cdk1 TSS s4     | GGAATCTCGATGTAAACACAA  | MNase protection assay |
| Cdk1 TSS s5     | TTGAACTGTGCCAATGCT     | MNase protection assay |
| Cdk1 TSS s6     | GAAGAACGGAGCGAACAG     | MNase protection assay |
| Cdk1 TSS s7     | TTGCGCTCGCACTCAGTT     | MNase protection assay |
| Cdk1 TSS s8     | TTCTTTGCGCTCTAGCC      | MNase protection assay |
| Cdk1 TSS s9     | GCGTAGCTGGGCTCTGAT     | MNase protection assay |
| Cdk1 TSS s10    | CCTTTAGCGCGGTGAGTT     | MNase protection assay |
| Cdk1 TSS s11    | GAAACTGCTCGCACTTGG     | MNase protection assay |
| Cdk1 TSS s12    | GCGACGCGGTTGTGTAG      | MNase protection assay |
| Cdk1 TSS s13    | GGGTCAGGGTCGTGTCTA     | MNase protection assay |
| Cdk1 TSS s14    | CACTGGGCTGGCTTTAGA     | MNase protection assay |
| Cdk1 TSS s15    | GTTGCGGGCTGCAGTCAT     | MNase protection assay |
| Cdk1 TSS s16    | AGTCGAGGTCGGCTGTTC     | MNase protection assay |
| Cdk1 TSS as1    | GGCTCCAAGGAGCACATTT    | MNase protection assay |
| Cdk1 TSS as2    | TGTTTTTCTAAATGCGTGATT  | MNase protection assay |
| Cdk1 TSS as3    | TGTGTTTACATCGAGATTCCA  | MNase protection assay |
| Cdk1 TSS as4    | CAGCATTGGCACAGTTCAA    | MNase protection assay |
| Cdk1 TSS as5    | GCGGAGCAGGAAGCTACT     | MNase protection assay |
| Cdk1 TSS as6    | CCAGTCGGGAGAGTGTCG     | MNase protection assay |
| Cdk1 TSS as7    | GTTGGCTAGAGCGCGAAA     | MNase protection assay |
| Cdk1 TSS as8    | GCCCGTAGACTTTCAAAGCA   | MNase protection assay |
| Cdk1 TSS as9    | AACTCACCGGCTAAAGG      | MNase protection assay |
| Cdk1 TSS as10   | TCGCTCTCCGCTCAATTT     | MNase protection assay |
| Cdk1 TSS as11   | GCGGCAGCTACAACAACC     | MNase protection assay |
| Cdk1 TSS as12   | GCCGTCCCCTAGACACGA     | MNase protection assay |
| Cdk1 TSS as13   | CCAGTCCGGCCTTCTTAG     | MNase protection assay |
| Cdk1 TSS as14   | ATGACTGCAGCCCCGAAC     | MNase protection assay |
| Cdk1 TSS as15   | CAATCAAGACCCGAAAGC     | MNase protection assay |
| Cdk1 TSS as16   | GGAGCGGATTTTGCTTCA     | MNase protection assay |
| Cdc25c TSS s1   | AGTCTCTGAGATGCTGCACAC  | MNase protection assay |
| Cdc25c TSS s2   | CATAAACACACACACCCGTCT  | MNase protection assay |
| Cdc25c TSS s3   | GGCCAGCAAACTTAGAAGAA   | MNase protection assay |
| Cdc25c TSS s4   | ACACCCTCCACCCAAAATAA   | MNase protection assay |
| Cdc25c TSS s5   | GTTTAAATCTCCGGGGTTC    | MNase protection assay |
| Cdc25c TSS s6   | AGGGAGAGCCAATGATGC     | MNase protection assay |
| Cdc25c TSS s7   | GGCCAAACACTATCCTGCTC   | MNase protection assay |
| Cdc25c TSS s8   | GTGATCTGCGAGCCCAAC     | MNase protection assay |
| Cdc25c TSS s9   | AGCGGGGATAGGTTACTGG    | MNase protection assay |
| Cdc25c TSS s10  | TAATTTGGCCTTCTGCTCA    | MNase protection assay |
| Cdc25c TSS s11  | GAAGGCAGAGCTGCAATCTA   | MNase protection assay |
| Cdc25c TSS s12  | CCTGTGTCCGATCCCTATCT   | MNase protection assay |
| Cdc25c TSS s13  | GTAAGTCCGAGCCGTCTC     | MNase protection assay |
| Cdc25c TSS s14  | CCCACAGACAGAGGTTGG     | MNase protection assay |
| Cdc25c TSS as1  | ACGGGTGTGTGTTTTATGC    | MNase protection assay |
| Cdc25c TSS as2  | CTAAGTTTTGCTGGCCTTCC   | MNase protection assay |
| Cdc25c TSS as3  | TTATTTTGGGTGGAGGGTGT   | MNase protection assay |
| Cdc25c TSS as4  | GATTTAAACCGCGCCTTACT   | MNase protection assay |
| Cdc25c TSS as5  | TCTCCCTCTACCAATCTCC    | MNase protection assay |
| Cdc25c TSS as6  | CCATAGCCAGAGCAGGATAG   | MNase protection assay |
| Cdc25c TSS as7  | GTTGGGCTCGCAGATCAC     | MNase protection assay |
| Cdc25c TSS as8  | CTAAGCTGCGTCAGCCAAT    | MNase protection assay |
| Cdc25c TSS as9  | AGTTACGGCCTCTGAGCAAG   | MNase protection assay |
| Cdc25c TSS as10 | ATTGACGCTCTGCCTTCC     | MNase protection assay |
| Cdc25c TSS as11 | AGATAGGGATCGGACACAGG   | MNase protection assay |
| Cdc25c TSS as12 | CTGCGGACTTACCTCAAGC    | MNase protection assay |
| Cdc25c TSS as13 | TCCCAACCTCTGTCTGTGG    | MNase protection assay |
| Cdc25c TSS as14 | CACAGCTCGAGACTCCTGAC   | MNase protection assay |

**Table S2. Antibodies used in this study**

| Antibody                                                                                           | Company                  | Catalogue number | Species | Dilution | Usage        | Research ResourceIdentifier (RRID) |
|----------------------------------------------------------------------------------------------------|--------------------------|------------------|---------|----------|--------------|------------------------------------|
| Keratin 14                                                                                         | Covance                  | PRB-155P-100     | Rabbit  | 1:1000   | IF           | AB_292096                          |
| Keratin 10                                                                                         | Santa Cruz               | sc23877          | Mouse   | 1:200    | IF           | AB_2134668                         |
| Keratin 6                                                                                          | Abcam                    | Ab24646          | Rabbit  | 1:200    | IF           | AB_448211                          |
| Keratin 6                                                                                          | Thermo Fisher            | MS-766-P0        | Mouse   | 1:100    | IF           | AB_141613                          |
| Ki67                                                                                               | Vector Labs              | VP-RM04          | Rabbit  | 1:200    | IF           | AB_2336545                         |
| RNA pol II N-20                                                                                    | Santa Cruz               | sc-899           | Rabbit  | 10ug per | ChIP         | AB_632359                          |
| H3K4Me1                                                                                            | Abcam                    | Ab8895           | Rabbit  | 5ug per  | ChIP         | AB_306847                          |
| H3K27Ac                                                                                            | Abcam                    | Ab4729           | Rabbit  | 10ug per | ChIP         | AB_2118291                         |
| RNA Pol II P Ser 2                                                                                 | MBL                      | MAB10602         | Mouse   | 1:2000   | Western Blot | AB_2747403                         |
| RNA Pol II P Ser 5                                                                                 | MBL                      | MAB10603         | Mouse   | 1:2000   | Western Blot | AB_2728736                         |
| RNA Pol II total CTD                                                                               | MBL                      | MAB10601         | Mouse   | 1:2000   | Western Blot | AB_2728735                         |
| Vinculin                                                                                           | Abcam                    | ab129002         | Rabbit  | 1:10000  | Western Blot | AB_11144129                        |
| Goat anti-Rabbit IgG (H+L)<br>Highly Cross-Adsorbed<br>Secondary Antibody, Alexa<br>Fluor Plus 488 | Thermo Fisher Scientific | A32731           | Goat    | 1:500    | IF           | AB_2633280)                        |
| Goat anti-Mouse IgG (H+L)<br>Highly Cross-Adsorbed<br>Secondary Antibody, Alexa<br>Fluor Plus 555  | Thermo Fisher Scientific | A32727           | Goat    | 1:500    | IF           | AB_2633276                         |
| Goat anti-Mouse IgG (H+L)<br>Secondary Antibody, HRP                                               | Thermo Fisher Scientific | 31430            | Goat    | 1:10000  | Western Blot | AB_228307                          |
| Goat anti-Rabbit IgG (H+L)<br>Secondary Antibody, HRP                                              | Thermo Fisher Scientific | 65-6120          | Goat    | 1:10000  | Western Blot | AB_2533967                         |

**Table S3. SiRNA constructs and summary of time points.**

| siRNA   | ENSEMBL ID      | siRNA name       | Company       |
|---------|-----------------|------------------|---------------|
| Control | N/A             | AllStars neg ctr | Qiagen        |
| Rn7SK   | ENSG00000283293 | 7SK siRNA 5      | Qiagen        |
| Rn7SK   | ENSG00000283293 | 7SK siRNA 205    | Thermo Fisher |
| Rn7SK   | ENSG00000283293 | 7SK siRNA 207    | Thermo Fisher |
| Larp7   | ENSG00000174720 | Larp7 siRNA 4    | Qiagen        |

| siRNA | Experiment                       | Time point (after transfection) |
|-------|----------------------------------|---------------------------------|
| Rn7sk | RNA Pol II ChIPseq               | 18 hours                        |
|       | H3K4Me1 ChIPseq                  | 18 hours                        |
|       | H3K27Ac ChIPseq                  | 18 hours                        |
|       | Total RNAseq low or high calcium | 48 hours                        |
|       | 4SU/Total RNAseq_1               | 24 hours                        |
|       | 4SU/Total RNAseq_2               | 24 hours                        |

**Table S4. Taqman probes used in this study**

| <b>Taqman probe</b> | <b>Target gene name</b> | <b>Species</b> |
|---------------------|-------------------------|----------------|
| Human GAPDH CTR     | Gapdh                   | Human          |
| Hs00277883_m1       | Larp7                   | Human          |
| Hs00902520_m1       | Involucrin              | Human          |
| Hs01070316_m1       | Tgm1                    | Human          |
| Hs01041013_m1       | Itga6                   | Human          |
| Hs00899658_m1       | Mmp1                    | Human          |
| Hs00938777_m1       | Cdk1                    | Human          |
| Hs00160519_m1       | Klk6                    | Human          |
| Hs00174970_m1       | STC1                    | Human          |
| Hs00156411_m1       | CDC25C                  | Human          |
| Hs00960349_m1       | MCM10                   | Human          |
| Hs01596213_g1       | KRT37                   | Human          |
| Hs00820278_sH       | LCE2A                   | Human          |
| Hs00907337_m1       | CDC45                   | Human          |
| Mm00486872_m1       | Cdc25c                  | Mouse          |
| Mm00772472_m1       | Cdk1                    | Mouse          |
| Mm00486893_m1       | Cdc45                   | Mouse          |
| Mm01171453_m1       | CcnB2                   | Mouse          |
| Mm00712529_m1       | Mcm10                   | Mouse          |
